# Supplementary material
Source: Springer Nature journal article supplement (https://www.springerprofessional.de/resource/supplementary/13638_2013_891_MOESM5_ESM.pdf/11899142)

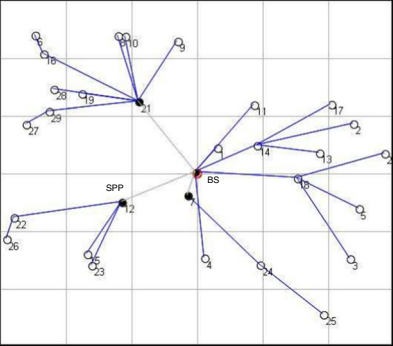

(a)

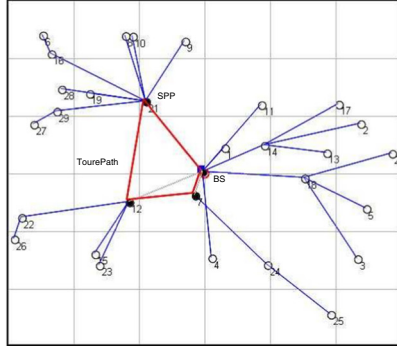

(b)

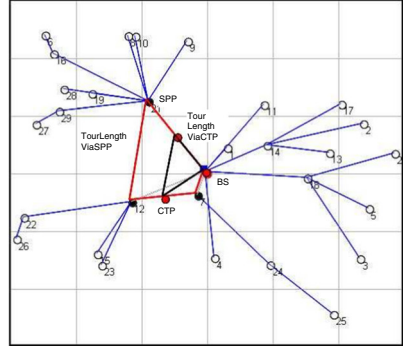

(c)

Supplement: MOESM5 [file 11899142]
